# Supplementary material for: Generation Mechanism of the Defects in g-C3N4 Synthesized in N2 Atmosphere and the Method for Improving Photocatalysis Activity
Source: MDPI journal article supplement (doi:10.3390/catal13020269), 2023-01-25
Supplement: s1 [file s1]

Archive with 1 entries (1 files):
- catalysts-2150285-supplementary.pdf
