# Supplementary material for: Generation Mechanism of the Defects in g-C3N4 Synthesized in N2 Atmosphere and the Method for Improving Photocatalysis Activity
Source: MDPI journal article supplement (doi:10.3390/catal13020269), 2023-01-25
Supplement: s1 [file s1 › catalysts-2150285-supplementary.pdf]

# Supporting information

## **Generation mechanism of the defects in g-C<sub>3</sub>N<sub>4</sub> synthesized in N<sub>2</sub> atmosphere and the method for improving photocatalysis activity**

Xinye Chang <sup>1</sup>, Huiqing Fan <sup>1\*</sup>, Lin Lei <sup>1</sup>, Xiaobo Wu <sup>1</sup>, Weijia Wang <sup>1\*</sup> and Longtao Ma <sup>2\*</sup>

<sup>1</sup> State Key Laboratory of Solidification Processing, School of Materials Science and Engineering, Northwestern Polytechnical University, Xi'an 710072, China; xinyechang@163.com (X.C.); 15123812005@163.com (L.L.); xiaobo\_wu2000@163.com (X.W.)

<sup>2</sup> Institute of Flexible Electronics, Northwestern Polytechnical University, Xi'an 710072, China

\* Correspondence: [hqfan@nwpu.edu.cn](mailto:hqfan@nwpu.edu.cn) (H. F.); [weijia.wang@nwpu.edu.cn](mailto:weijia.wang@nwpu.edu.cn) (W. W.); [iamltma@nwpu.edu.cn](mailto:iamltma@nwpu.edu.cn) (L. M.)

**Results and discussion (Figure S1-S7 and Table S1-S2)**

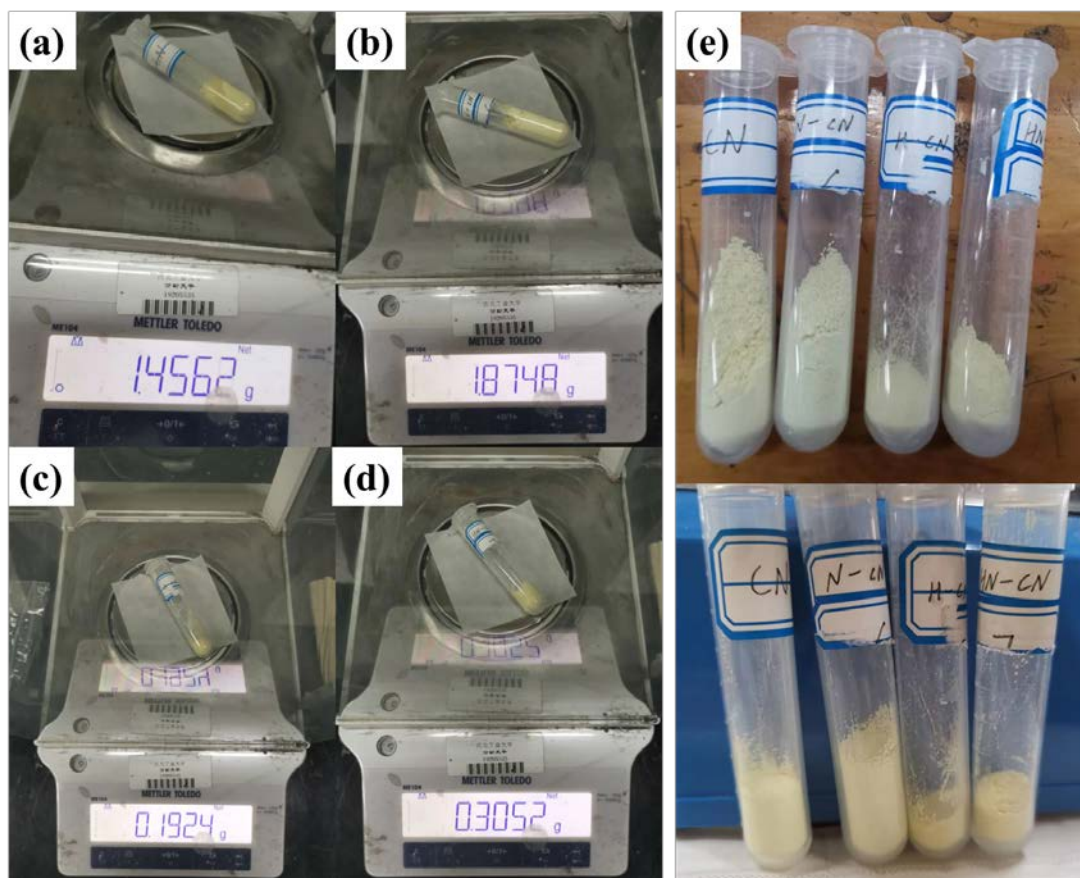

**Figure S1.** The weight of CN (a), N-CN (b), H-CN (c), and HN-CN(d), and their volume comparison (e).

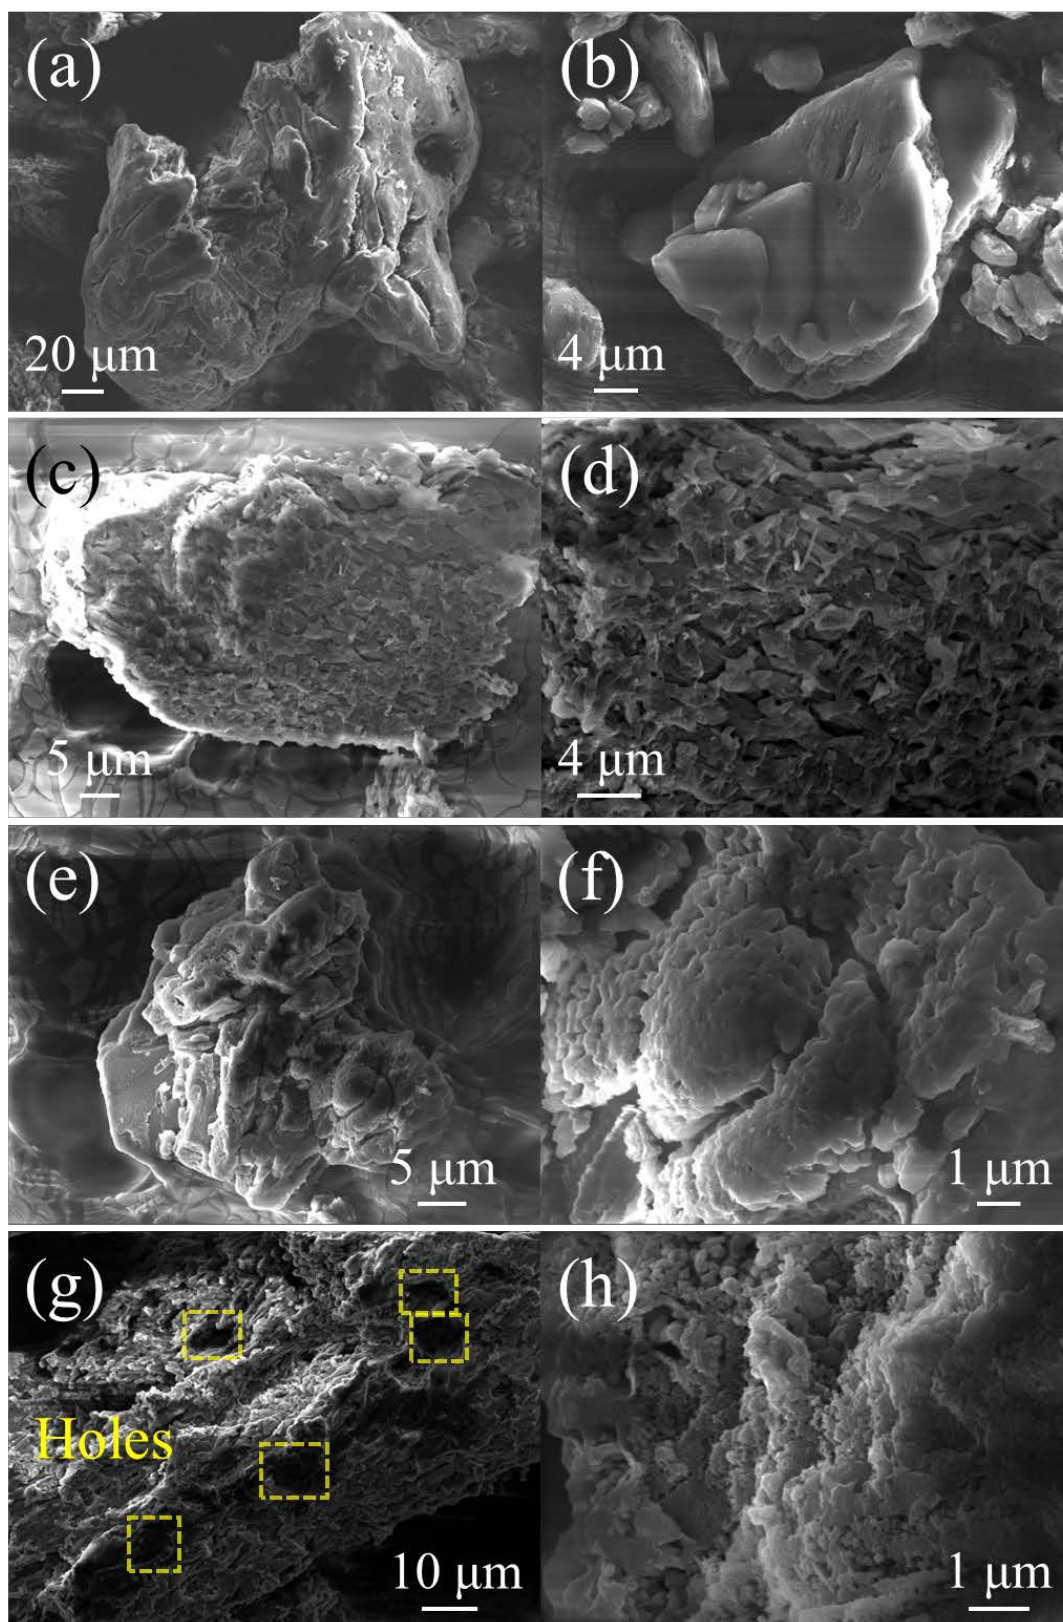

**Figure S2.** SEM images of CN (a) (b), H-CN (c) (d), N-CN (e) (f), and HN-CN (g) (h).

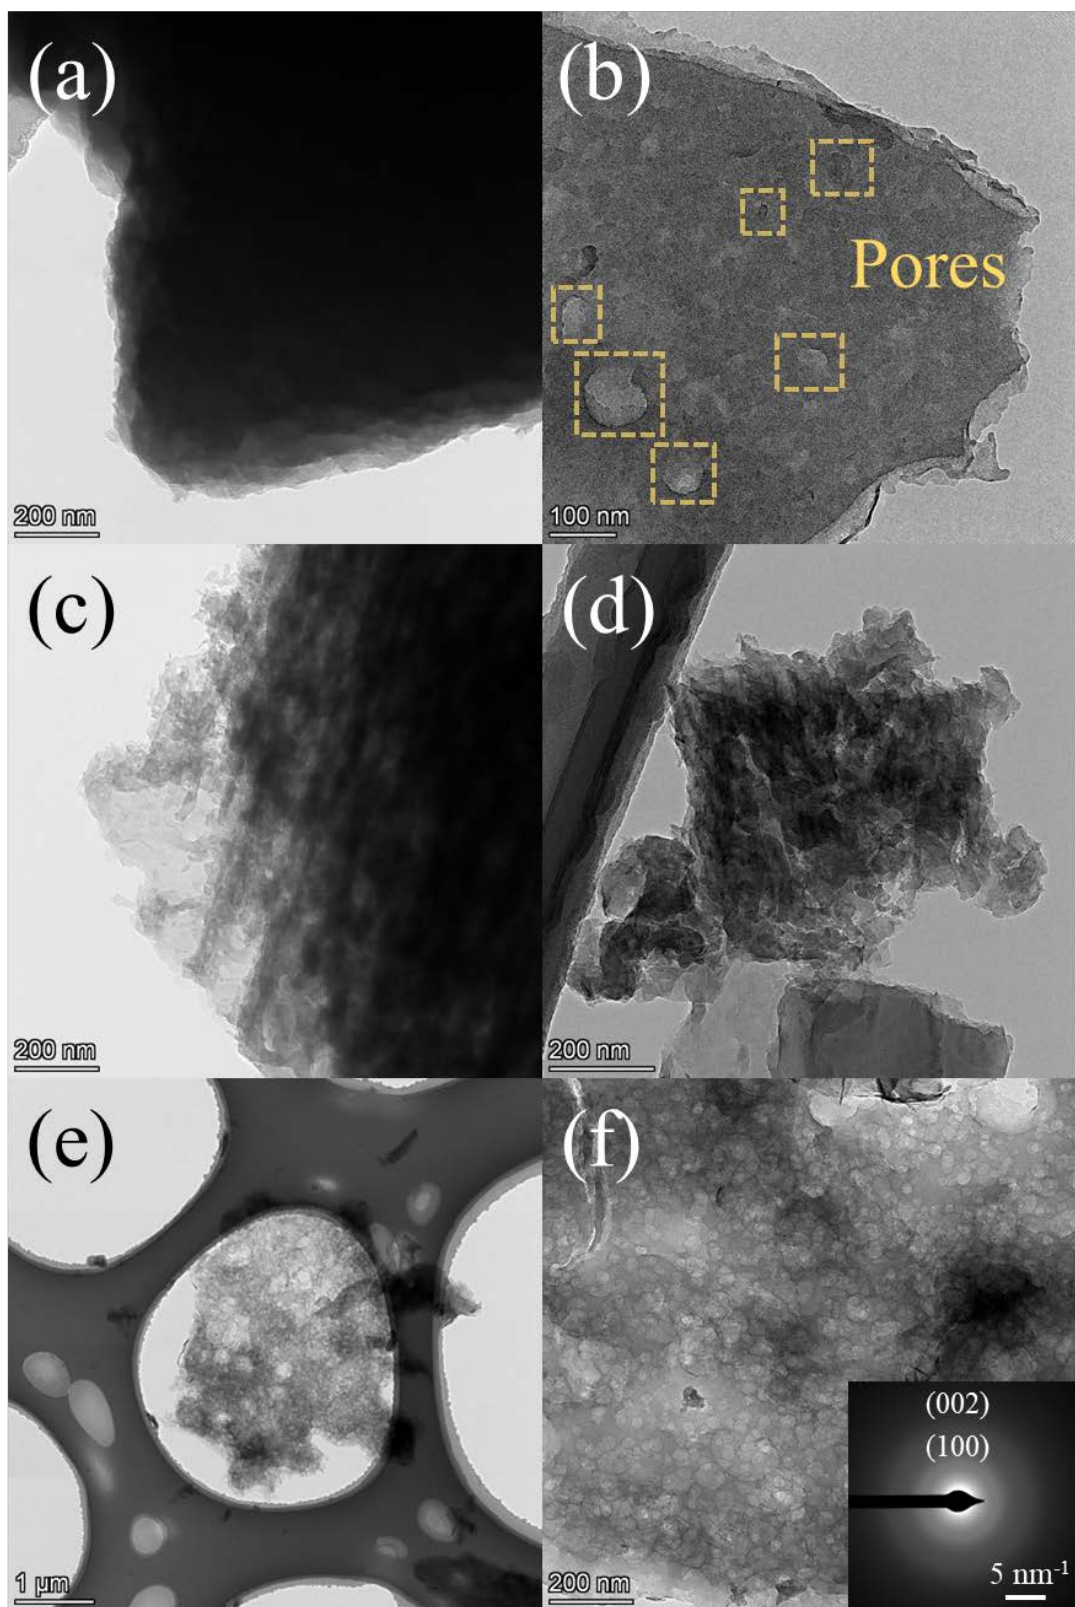

**Figure S3.** TEM images of CN (a), H-CN (b), N-CN (c) (d), and HN-CN (e) (f). Inset in (f) is the SAED pattern.

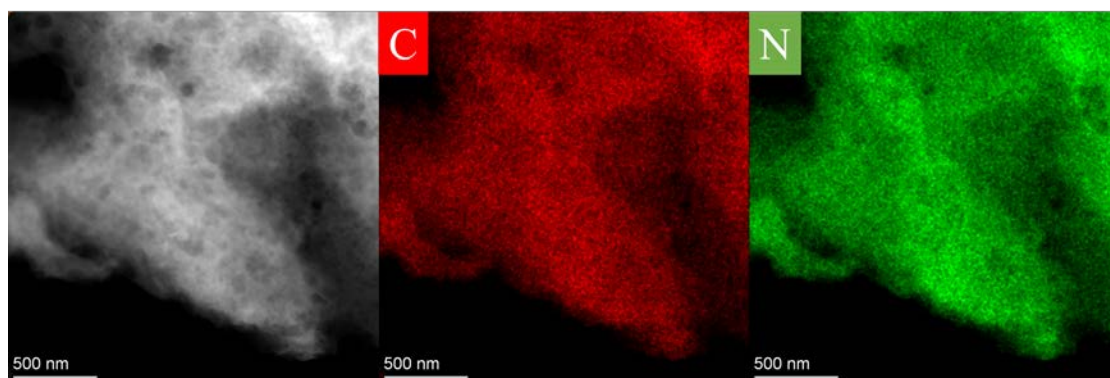

**Figure S4.** EDS elemental mapping patterns of HN-CN.

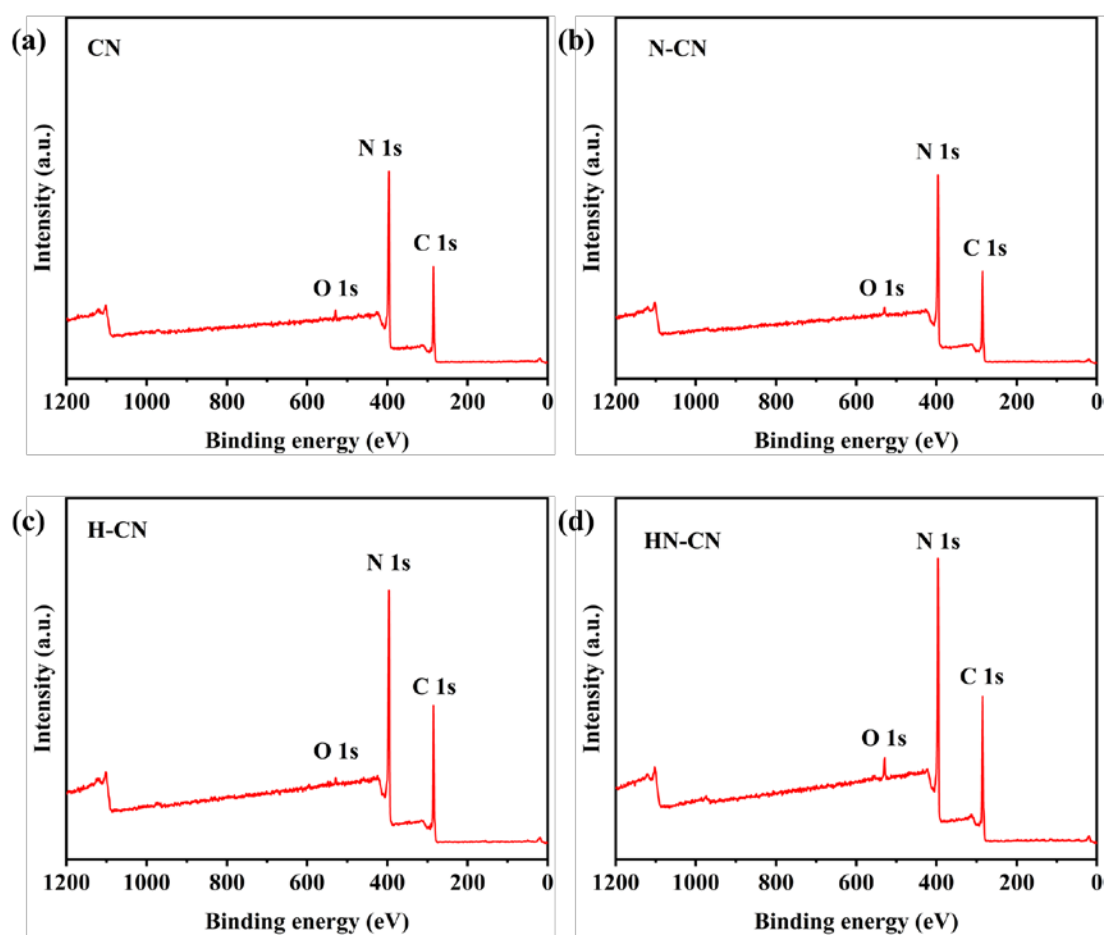

**Figure S5.** XPS survey spectrum of CN (a), N-CN (b), H-CN (c), and HN-CN (d).

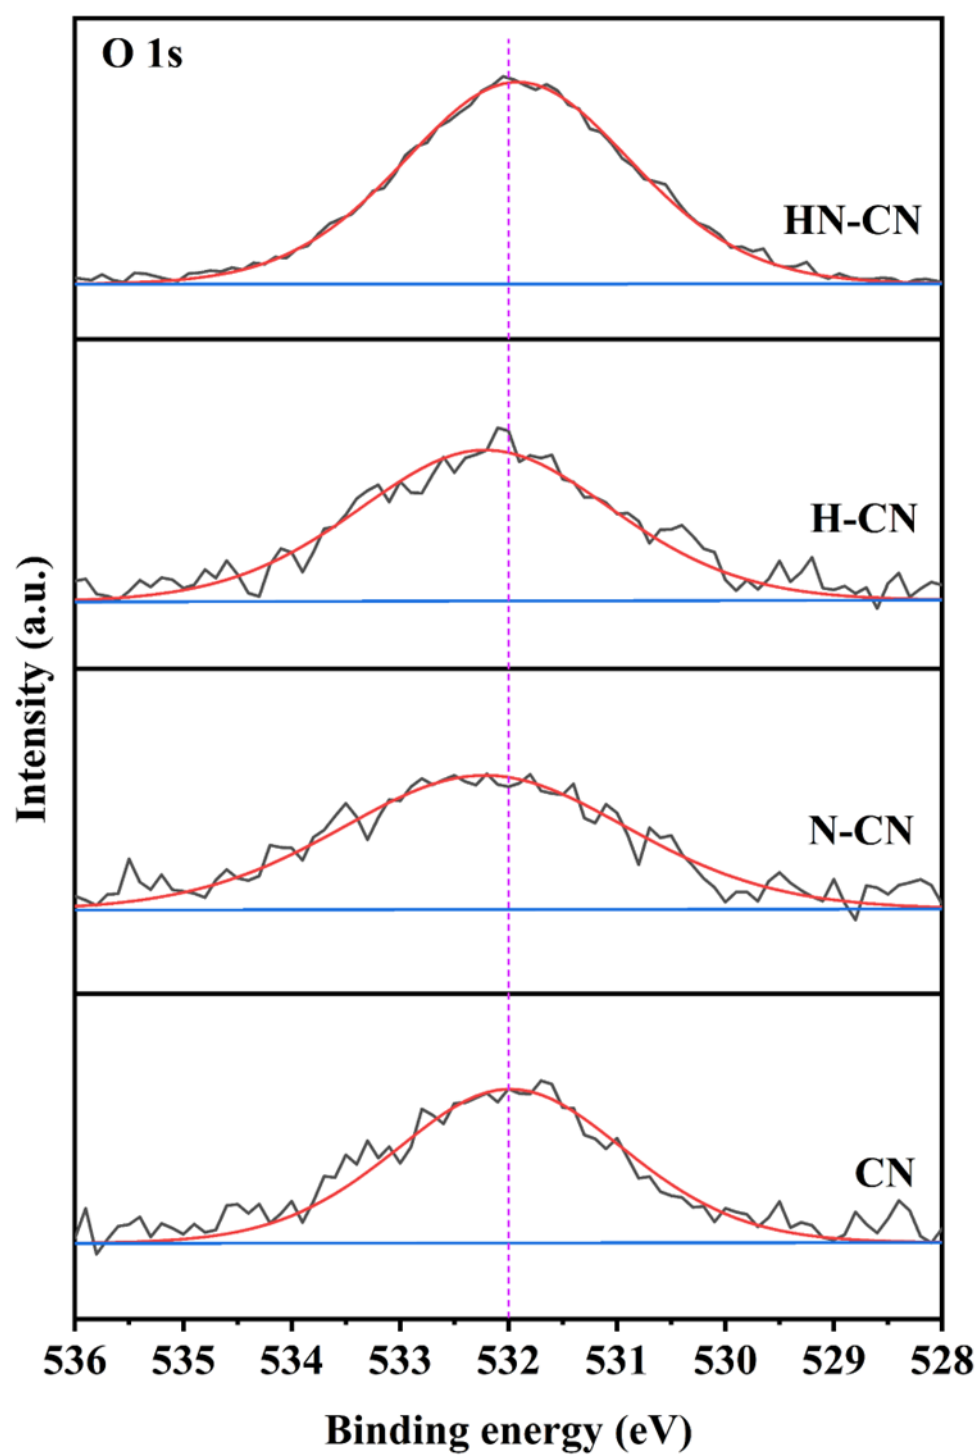

**Figure S6.** High resolution XPS O 1s spectra of CN, N-CN, H-CN, and HN-CN.

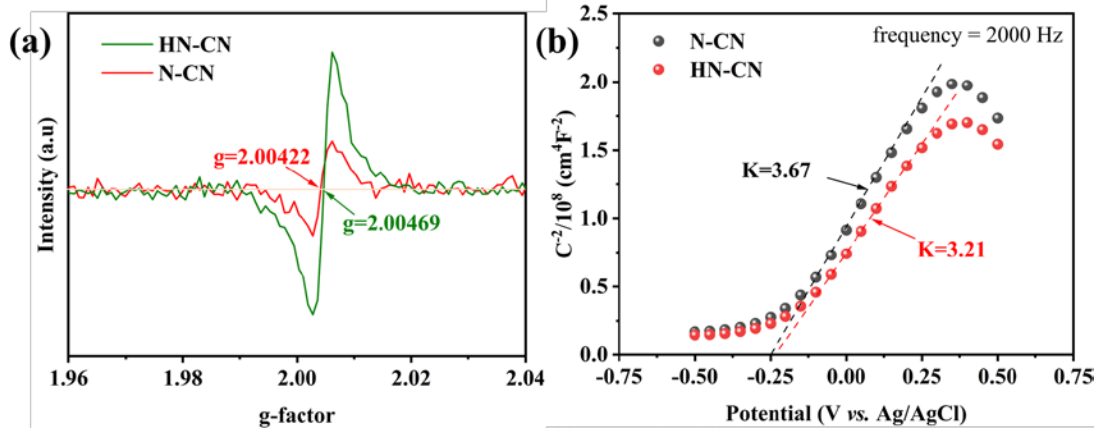

**Figure S7.** (a) EPR g-factor and (b) Mott-Schottky curves of N-CN and HN-CN.

The Lande factor ( $g$ ) can be calculated using the following equations:

$$g = \frac{h\nu}{\beta H} \quad (1)$$

where  $h$  is Planck constant,  $\nu$  is microwave frequency,  $\beta$  is Bohr magneton, and  $H$  is magnetic field strength.

Mott-Schottky curves can be used to determine the type of semiconductor, obtain the flat-band potential of the material, and reflect the density of the majority carrier in the sample. The relationship between the physical quantities follows the following equation:

$$\frac{1}{C^2} = \frac{2}{Ne\epsilon\epsilon_0} \left( E - E_{FB} - \frac{kT}{e} \right) \quad (2)$$

Where  $C$  is interfacial capacitance,  $e$  is the electron charge,  $N$  is the donor densities ( $\text{cm}^{-3}$ ),  $\epsilon$  is the dielectric constant of the passive film,  $\epsilon_0$  is the vacuum permittivity ( $8.854 \cdot 10^{-14} \text{ F/cm}$ ),  $k$  is the Boltzmann constant ( $1.38 \cdot 10^{-23} \text{ J/K}$ ),  $T$  is the absolute temperature and  $E_{FB}$  is the flat band potential.

The  $\frac{kT}{e}$  is about 25 mV at room temperature, which is usually negligible. The positive slope indicates that both N-CN and HN-CN are typical n-type semiconductors, and further calculation of the inverse of the slope shows that the carrier density of HN-CN is 1.14 times higher than that of N-CN. This result is good evidence that the step of protonated precursor can remove the defects generated in the  $\text{N}_2$  atmosphere that are detrimental to the carrier density increase. Moreover, the intercept of the tangent line to the transverse axis is in line with the flat-band potential of the samples, and the similar flat-band potential suggests that they have close conduction band potential, which is consistent with Figure 8d.

**Table S1.** The elemental analysis of different samples: CN, N-CN, H-CN, and HN-CN

| Sample | C (wt%) | N (wt%) | H (wt%) | O (wt%) | C/N (mass ratio) |
|--------|---------|---------|---------|---------|------------------|
| CN     | 34.13   | 62.15   | 2.01    | 1.71    | 0.55             |
| N-CN   | 34.63   | 62.78   | 1.93    | 0.66    | 0.55             |
| H-CN   | 33.18   | 59.57   | 2.29    | 4.96    | 0.56             |
| HN-CN  | 33.53   | 63.04   | 2.20    | 1.23    | 0.53             |

**Table S2.** The fractions of various C types for different samples: CN, N-CN, H-CN, and HN-CN

| Sample |      | C1     | C2    | C3      | C4     |
|--------|------|--------|-------|---------|--------|
| CN     | At % | 14.3   | 2.6   | 76.4    | 6.8    |
|        | Area | 2713.5 | 491.5 | 14492.5 | 1281.7 |
| N-CN   | At % | 9.5    | 3.4   | 45.9    | 41.2   |
|        | Area | 1853.3 | 663.6 | 8977.4  | 8051.9 |
| H-CN   | At % | 11.2   | 2.2   | 82.1    | 4.5    |
|        | Area | 2778.8 | 556.1 | 20427.9 | 1126.0 |
| HN-CN  | At % | 14.4   | 3.1   | 77.9    | 4.6    |
|        | Area | 3729.3 | 802.9 | 20222.6 | 1186.4 |

**Table S3.** The fractions of various N types for different samples: CN, N-CN, H-CN, and HN-CN

| Sample |      | N1      | N2      | N3     | N4     | (N1+N2)/N3 |
|--------|------|---------|---------|--------|--------|------------|
| CN     | At % | 48.8    | 32.7    | 12.9   | 5.7    | 6.32       |
|        | Area | 16022.4 | 10734.3 | 4232.9 | 1866.0 |            |
| N-CN   | At % | 36.2    | 37.0    | 20.3   | 6.4    | 3.60       |
|        | Area | 13360.1 | 13641.4 | 7496.1 | 2362.2 |            |
| H-CN   | At % | 59.4    | 22.1    | 12.2   | 6.3    | 6.65       |
|        | Area | 28864.1 | 10737.7 | 5953.9 | 3062.5 |            |
| HN-CN  | At % | 55.2    | 24.1    | 14.5   | 6.2    | 5.47       |
|        | Area | 26831.2 | 11689.7 | 7042.0 | 3004.2 |            |
